# Supplementary material for: Automatic brain structure segmentation for 18F-fluorodeoxyglucose positron emission tomography/magnetic resonance images via deep learning
Source: PubMed Central journal article supplement — Quant Imaging Med Surg. 2023 Jun 8;13(7):4447–62. doi: 10.21037/qims-22-1114 (PMC10347345; doi:10.21037/qims-22-1114), 2023-06-08
Supplement: qims-13-07-4447-supplementary.pdf [file qims-13-07-4447-supplementary.pdf]

**Table S1** Label correspondence table

| Label No. | Pixel values | Name                             |
|-----------|--------------|----------------------------------|
| 0         | 0            | Background                       |
| 1         | 2            | Left-Cerebral-White-Matter       |
| 2         | 3            | Left-Cerebral-Cortex             |
| 3         | 4            | Left-Lateral-Ventricle           |
| 4         | 5            | Left-Inferior-Lateral-Ventricle  |
| 5         | 7            | Left-Cerebellum-White-Matter     |
| 6         | 8            | Left-Cerebellum-Cortex           |
| 7         | 10           | Left-Thalamus-Proper             |
| 8         | 11           | Left-Caudate                     |
| 9         | 12           | Left-Putamen                     |
| 10        | 13           | Left-Pallidum                    |
| 11        | 14           | 3rd-Ventricle                    |
| 12        | 15           | 4th-Ventricle                    |
| 13        | 16           | Brain-Stem                       |
| 14        | 17           | Left-Hippocampus                 |
| 15        | 18           | Left-Amygdala                    |
| 16        | 24           | CSF                              |
| 17        | 26           | Left-Accumbens-Area              |
| 18        | 28           | Left-Ventral DC                  |
| 19        | 30           | Left-Vessel                      |
| 20        | 31           | Left-Choroid-Plexus              |
| 21        | 41           | Right-Cerebral-White-Matter      |
| 22        | 42           | Right-Cerebral-Cortex            |
| 23        | 43           | Right-Lateral-Ventricle          |
| 24        | 44           | Right-Inferior-Lateral-Ventricle |
| 25        | 46           | Right-Cerebellum-White-Matter    |
| 26        | 47           | Right-Cerebellum-Cortex          |
| 27        | 49           | Right-Thalamus-Proper            |
| 28        | 50           | Right-Caudate                    |
| 29        | 51           | Right-Putamen                    |
| 30        | 52           | Right-Pallidum                   |
| 31        | 53           | Right-Hippocampus                |
| 32        | 54           | Right-Amygdala                   |
| 33        | 58           | Right-Accumbens-Area             |
| 34        | 60           | Right-Ventral DC                 |
| 35        | 62           | Right-Vessel                     |
| 36        | 63           | Right-Choroid-Plexus             |
| 37        | 77           | WM-Hypointensity                 |
| 38        | 80           | Non-WM-Hypointensity             |
| 39        | 85           | Optic-Chiasm                     |
| 40        | 251          | CC_Posterior                     |
| 41        | 252          | CC_Mid_Posterior                 |
| 42        | 253          | CC_Central                       |
| 43        | 254          | CC_Mid_Anterior                  |
| 44        | 255          | CC_Anterior                      |

CC, corpus callosum; CSF, cerebrospinal fluid; DC, dorsal caudate; WM, white matter.
